# Supplementary material
Source: publisher figshare collection journal article supplement (https://acs.figshare.com/ndownloader/files/11109407)
Supplement: Supplementary file 1 [file 11109407]

## Supporting Information

### Understanding Charge Transport in Endohedral Fullerene Single-Crystal Field-Effect Transistors

*Xiaoming Zhao,<sup>1\*</sup> Tianjun Liu,<sup>2\*</sup> Wenda Shi,<sup>1</sup> Xueyan Hou,<sup>1</sup> Zilu Liu,<sup>3</sup> and T. John S.*

*Dennis<sup>1\*</sup>*

<sup>1</sup> School of Physics and Astronomy and Materials Research Institute, Queen Mary University of London, Mile End Road, London E1 4NS, United Kingdom

<sup>2</sup> School of Engineering and Materials Science and Materials Research Institute, Queen Mary University of London, Mile End Road, London E1 4NS, United Kingdom

<sup>3</sup> School of Biological and Chemical Sciences and Materials Research Institute, Queen Mary University of London, Mile End Road, London E1 4NS, United Kingdom

\* Corresponding author: T. John S. Dennis (email: [j.dennis@qmul.ac.uk](mailto:j.dennis@qmul.ac.uk))

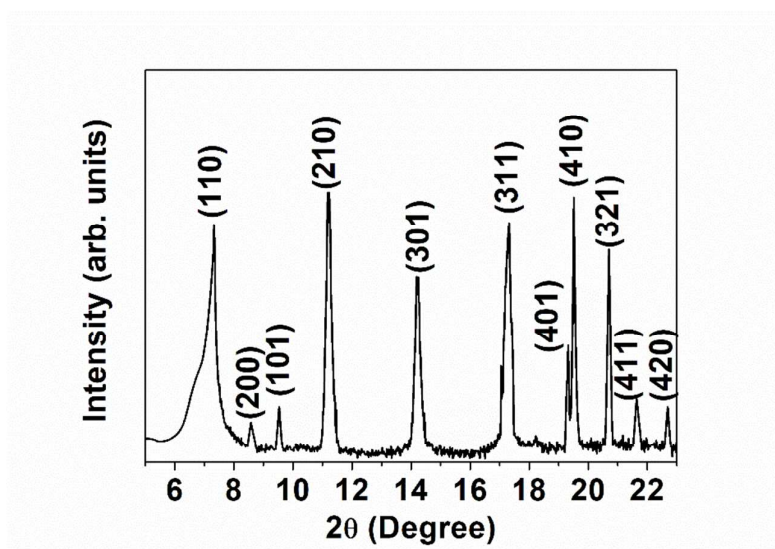

**Figure S1** XRD pattern of as-prepared N@C<sub>60</sub> single crystals.

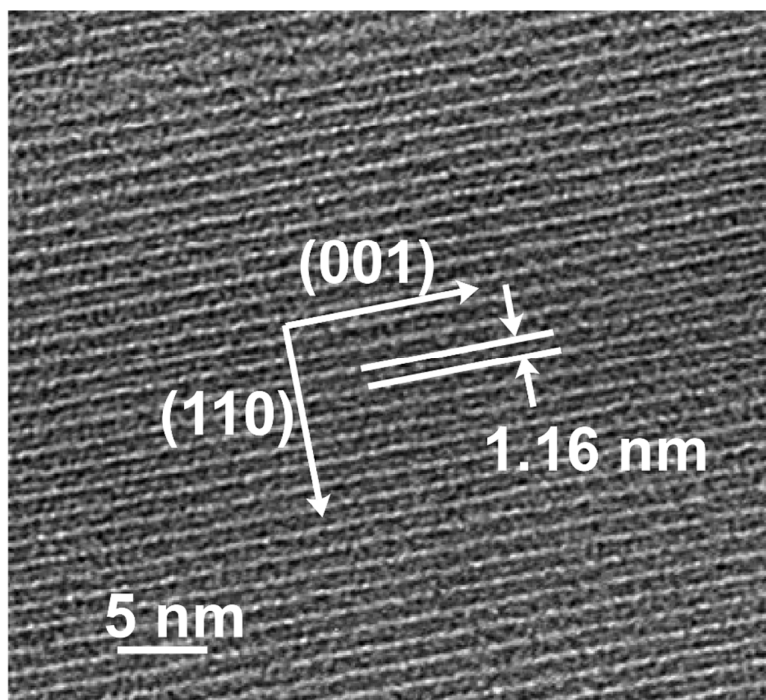

**Figure S2** HRTEM image of as-prepared N@C<sub>60</sub> single crystal.

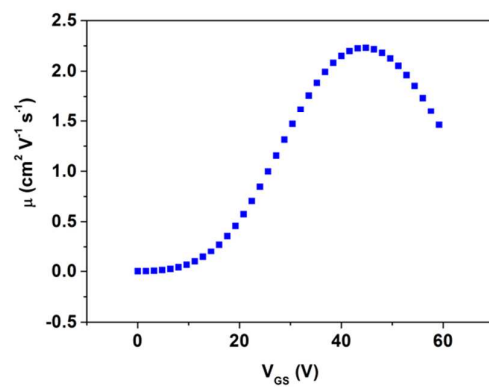

**Figure S3** Typical gate-bias dependent mobility for devices based on N@C<sub>60</sub> needle crystals.

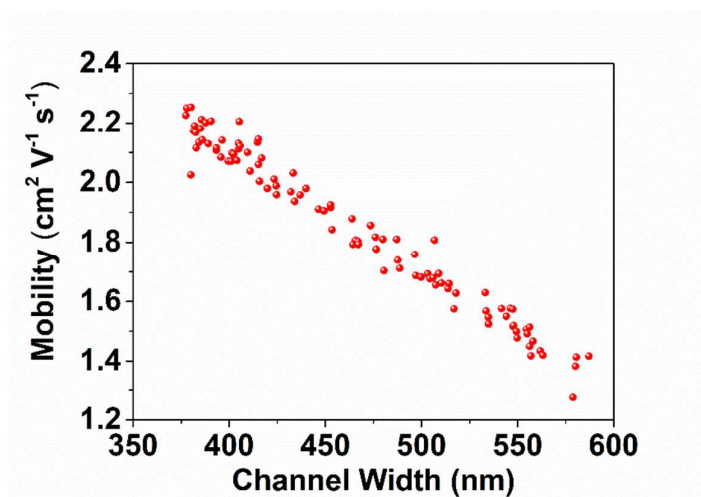

**Figure S4** Channel width dependences of mobilities in OFETs based on N@C<sub>60</sub> single crystals.
